# Supplementary material for: Machine learning of human plasma lipidomes for obesity estimation in a large population cohort
Source: PLoS Biol. 2019 Oct 18;17(10):e3000443. doi: 10.1371/journal.pbio.3000443 (PMC6799887; doi:10.1371/journal.pbio.3000443)
Supplement: S9 Table — Effect of different input variables and lipidome detail on the BFP, BMI, WC, and WHR regressions. Modeling was either done without age and sex as covariables (−Age, −Sex) or with (+Age, +Sex). Results are shown according to lipidome detail (Level). Either no lipid information was used (No Lipids), or lipidome information was aggregated into lipid categories (Categories), lipid classes (Classes), and lipid species (Species). Subspecies denotes the highest structural resolution possible on the platform with a mix of species and subspecies. Variables in addition to the lipidome input used are: No additional input [L], Routine clinical laboratory variables [C], Additional variables [A], or the combination of clinical and additional variables [C+A]. See caption of S7 Fig for more details. R2 cross-validation mean and standard deviation (n = 50) based on the FINRISK training data set, and only subjects have been used for which all obesity measures were available (n = 796). BFP, body fat percentage; BMI, body mass index; WC, waist circumference; WHR, waist-hip ratio. (XLSX) [file pbio.3000443.s026.xlsx]

## Sheet: R2 values
Y-variable
